# Supplementary material for: Activating atomically dispersed Co–N/C sites on g-C3N4 nanosheets via incorporating sulfur enables efficient visible light H2 evolution
Source: Royal Society of Chemistry journal article supplement (doi:10.1039/d1se01702k), 2021-11-15
Supplement: d1se01702k1.pdf [file d1se01702k1.pdf]

**Electronic Supplementary Material for**  
**Activating atomically dispersed Co-N/C sites on g-C<sub>3</sub>N<sub>4</sub>**  
**nanosheets via incorporating sulfur enables efficient visible light**  
**H<sub>2</sub> evolution**

Fang Wang<sup>a,b</sup>, Yuan Xue<sup>b</sup>, Weibing Xu<sup>a\*</sup>, Shixiong Min<sup>b\*</sup>

*<sup>a</sup>School of Chemistry and Chemical Engineering, Hefei University of Technology,  
Hefei, 230009, P. R. China.*

*<sup>b</sup>School of Chemistry and Chemical Engineering, North Minzu University, Yinchuan,  
750021, P. R. China.*

\*Corresponding authors: [weibingxu@hfut.edu.cn](mailto:weibingxu@hfut.edu.cn); [sxmin@nun.edu.cn](mailto:sxmin@nun.edu.cn)

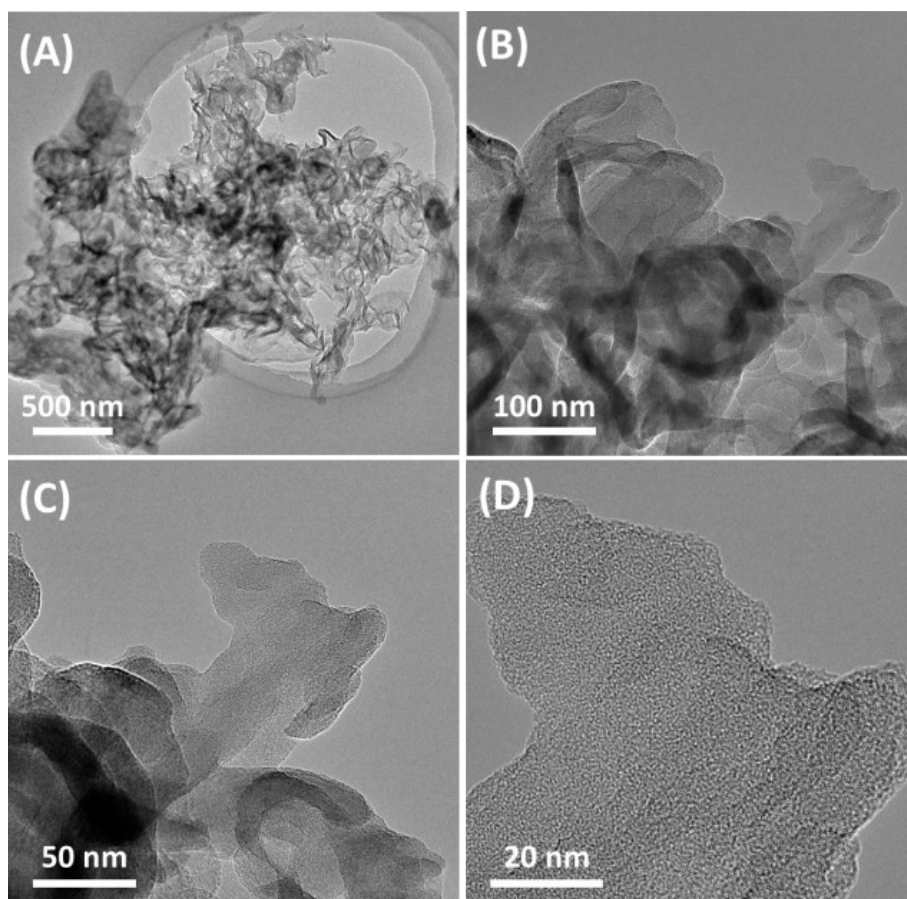

**Fig. S1** TEM images of pristine CNs.

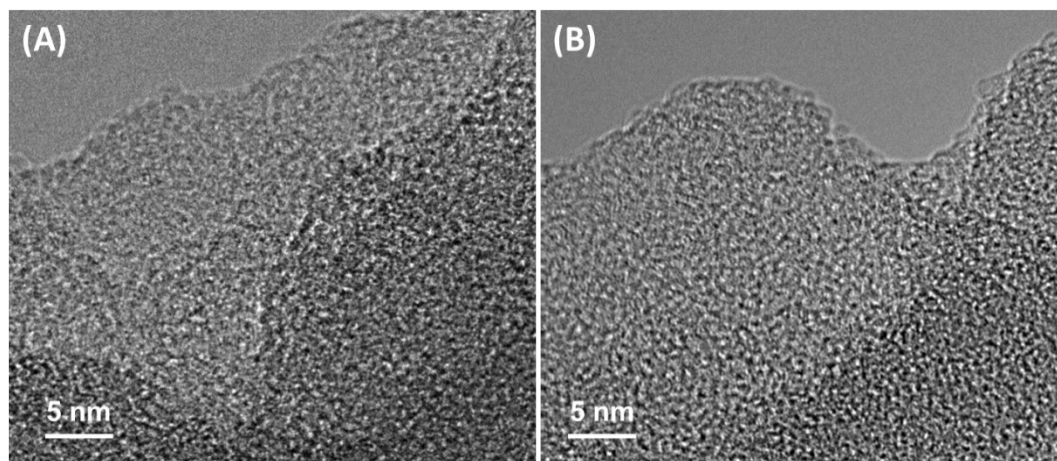

**Fig. S2** HRTEM images of (A) Co-CN and (B) S-Co-CN.

**Table S1** Chemical composition of Co-CN and S-Co-CN catalysts determined by using EDX analysis.

| Sample  | C (at.%) | N (at.%) | Co (at.%) | O (at.%) | S (at.%) |
|---------|----------|----------|-----------|----------|----------|
| Co-CN   | 41.94    | 56.03    | 0.18      | 1.85     | 0        |
| S-Co-CN | 43.88    | 50.14    | 0.17      | 5.62     | 0.19     |

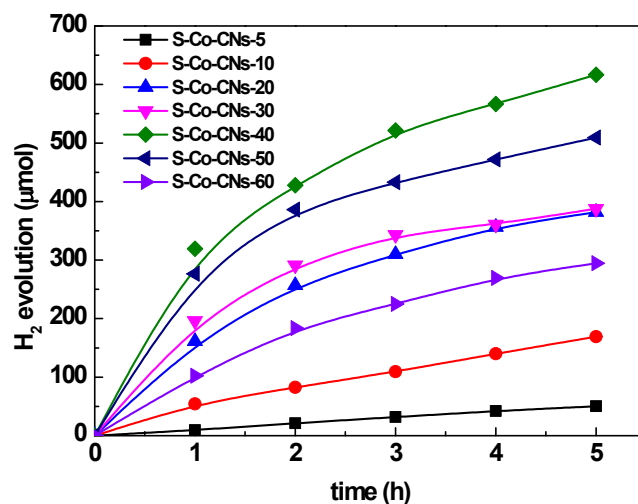

**Fig. S3** Time courses of H<sub>2</sub> evolution over ErB-sensitized S-Co-CNs catalysts with different Co contents. Reaction conditions: catalyst, 50 mg; 100 mL of TEOA solution, 10%, pH 8; ErB, 0.2 mM; light source, 30-W LED lamp,  $\lambda \geq 450$  nm.

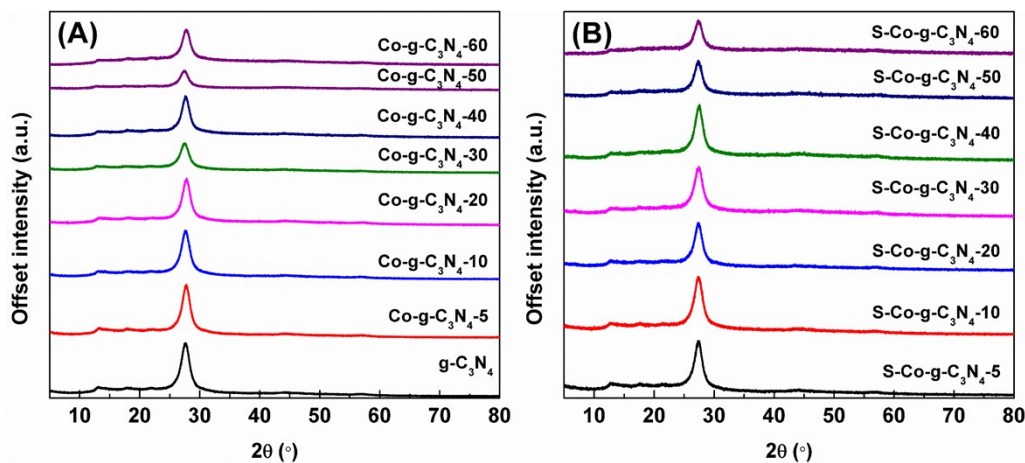

**Fig. S4** XRD patterns of (A) Co-g-CNs and (B) S-Co-g-CNs prepared with with different amounts of Co(NO<sub>3</sub>)<sub>2</sub>·6H<sub>2</sub>O.

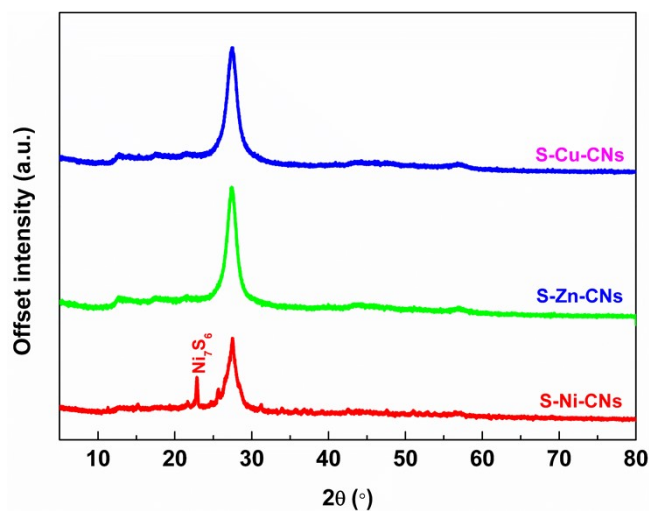

**Fig. S5** XRD patterns of S-M-CNs catalysts.

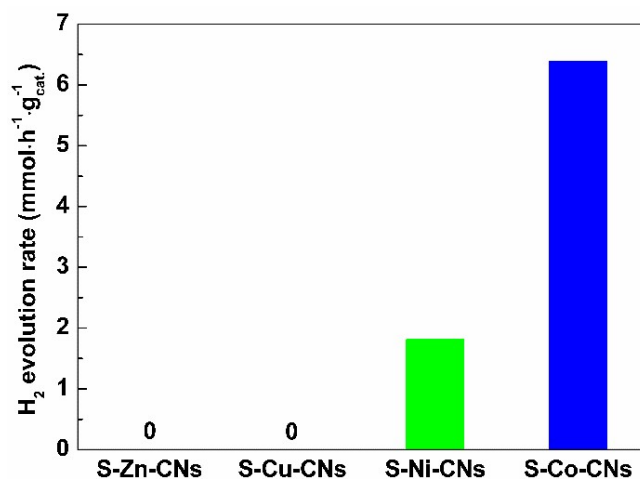

**Fig. S6** H<sub>2</sub> evolution rates on different S-M-CN catalysts in ErB-TEOA system.

Reaction conditions: catalyst, 50 mg; 100 mL of TEOA solution, 10%, pH 8; ErB, 0.2 mM; light source, 30-W LED lamp,  $\lambda \geq 450$  nm.

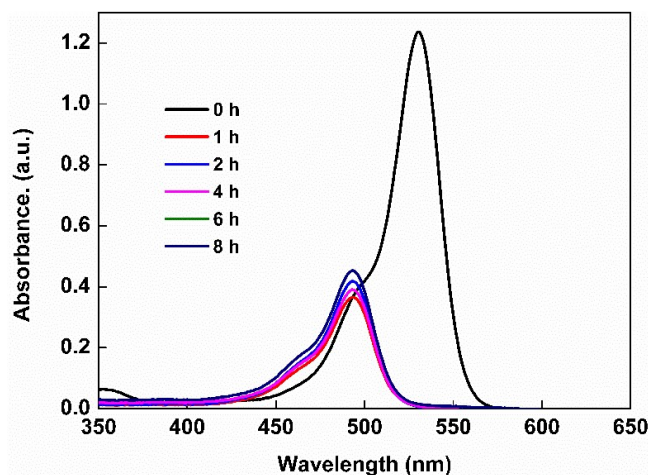

**Fig. S7** UV-vis absorption spectra of ErB during the photocatalytic H<sub>2</sub> reaction under visible light irradiation. Reaction conditions: S-Co-CNs, 50 mg; ErB, 0.2 mM; 100 mL TEOA solution, pH 8; light source, 30-W LED lamp,  $\lambda \geq 450$  nm. The S-Co-CNs was removed by filtration and the remaining ErB solution was diluted by 10 times.

**Table S2** The comparison of photocatalytic H<sub>2</sub> evolution activity and AQY in dye-sensitized g-C<sub>3</sub>N<sub>4</sub> loaded with different cocatalysts under visible light irradiation.

| Catalyst                                               | Dye                      | Reaction conditions          | Light source                                 | Activity ( $\mu\text{mol h}^{-1}$ ) | AQY (%)        | ref |
|--------------------------------------------------------|--------------------------|------------------------------|----------------------------------------------|-------------------------------------|----------------|-----|
| mpg-C <sub>3</sub> N <sub>4</sub> /Pt (1 wt.%) (30 mg) | EY (0.4 M)               | TEOA (80 mL, 15 vol.%, pH 7) | 250 W high pressure Hg lamp ( $\geq 420$ nm) | 115.5                               | 14.4% (520 nm) | 1   |
| g-C <sub>3</sub> N <sub>4</sub> /Pt (7 wt.%) (100 mg)  | EY (12.5 $\mu\text{M}$ ) | TEOA (80 mL, 0.79 M, pH 7)   | 400 W high pressure Hg lamp ( $\geq 420$ nm) | 160                                 | 18.8 (400~700) | 2   |

|                                                                                     |                                                |                                |                                              |        |                                |           |
|-------------------------------------------------------------------------------------|------------------------------------------------|--------------------------------|----------------------------------------------|--------|--------------------------------|-----------|
| g-C <sub>3</sub> N <sub>4</sub> /Pt (1.25 wt.%) (100 mg)                            | ErB (2.27 mM)                                  | TEOA (100 mL, 5 vol.%, pH 9)   | 300 W Xe lamp ( $\geq 420$ nm)               | 652.5  | 33.4% (460 nm)                 | 3         |
| Pt (1 wt. %)/g-C <sub>3</sub> N <sub>4</sub> (10 mg)                                | Zn-tri-PcNc (5.0 $\mu\text{mol g}^{-1}$ )      | AA (10 mL, 50 mM, pH 1.5–1.8)  | 300 W Xe lamp ( $\geq 500$ nm)               | 125.2  | 1.85% (700 nm)                 | 9         |
| Pt (0.5 wt. %)/g-C <sub>3</sub> N <sub>4</sub> (10 mg)                              | LI-4/Zn-tri-PcNc (5.0 $\mu\text{mol g}^{-1}$ ) | AA (10 mL, 50 mM, pH 1.5)      | 300 W Xe lamp ( $\geq 420$ nm)               | 371.4  | 7.7% (500 nm)                  | 10        |
| MoS <sub>x</sub> (0.5 wt. %)-g-C <sub>3</sub> N <sub>4</sub> (100 mg)               | ErB (12.5 $\mu\text{M}$ )                      | TEOA (80 mL, 0.79 M, pH 7)     | 400 W high pressure Hg lamp ( $\geq 420$ nm) | 26     | 8.3% (545 nm)                  | 8         |
| Co(OH) <sub>2</sub> (23 wt. %)/g-C <sub>3</sub> N <sub>4</sub> (26 mg)              | EY/RB (17 mg/25 mg)                            | TEOA (100 mL, 10 vol.%, pH 10) | 300 W Xe lamp ( $\geq 420$ nm)               | 144.2  | 29.6% (520 nm); 27.3% (550 nm) | 11        |
| g-C <sub>3</sub> N <sub>4</sub> /Pt SAs (0.74 wt. %) (10 mg)                        | EY (0.4 mM)                                    | TEOA (100 mL, 10 vol.%, pH 7)  | 30 W LED (520 nm)                            | 34.2   | 0.84% (520 nm)                 | 4         |
| g-C <sub>3</sub> N <sub>4</sub> /Pt/GO (50mg)                                       | EY (50 mg)                                     | TEOA (100 mL, 20 vol.%, pH 7)  | 300 W Xe lamp ( $\geq 420$ nm)               | 191    | 9.7% (420nm)                   | 6         |
| PtNi (0.5 wt. %)/g-C <sub>3</sub> N <sub>4</sub> (50 mg)                            | EY (50 mg)                                     | TEOA (100 mL, 20 vol.%, pH 7)  | 300 W Xe lamp ( $\geq 420$ nm)               | 294.5  | NA                             | 12        |
| MMT/g-C <sub>3</sub> N <sub>4</sub> /NiCoP (15 wt. %) (10mg)                        | EY(0.1mM)                                      | TEOA (100 mL, 10 vol.%, pH 11) | 300 W Xe lamp ( $\geq 420$ nm)               | 125    | 40.3% (420nm)                  | 7         |
| SnIn <sub>4</sub> S <sub>8</sub> /g-C <sub>3</sub> N <sub>4</sub> (11 wt. %) (50mg) | CoPc (1.75 mg)                                 | TEOA (100 mL, 15 vol.%)        | 500 W Xe lamp ( $\geq 430$ nm)               | 636.99 | NA                             | 5         |
| MoS <sub>2</sub> (50 wt. %)/g-C <sub>3</sub> N <sub>4</sub> (5 mg)                  | EY (20 $\mu\text{M}$ )                         | TEOA (40 mL, 10 vol.%)         | 300 W Xe lamp ( $\geq 420$ nm)               | 8.9    | NA                             | 13        |
| S-Co-CNs (0.18 at.% Co, 50 mg,)                                                     | ErB (0.2 mM)                                   | TEOA (100 mL, 10 vol.%, pH 8)  | 30 W LED ( $\geq 450$ nm)                    | 319    | 13.02% (520 nm)                | This work |

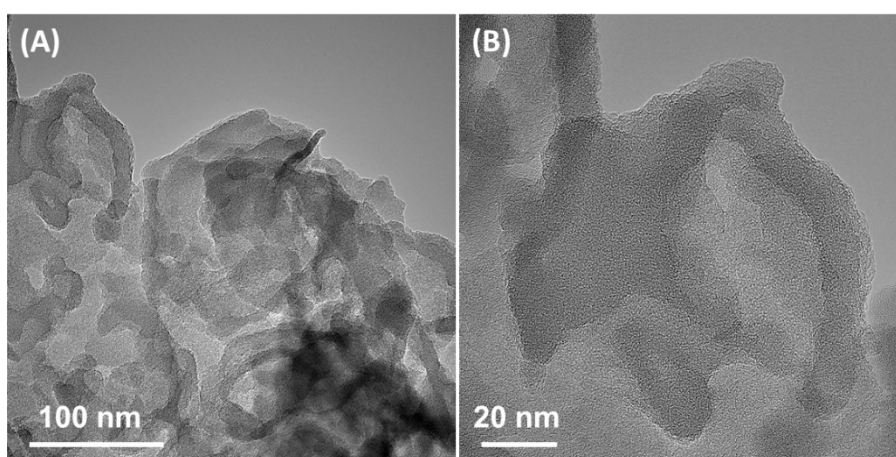

**Fig. S8** TEM images of S-Co-CNs catalyst after stability test.

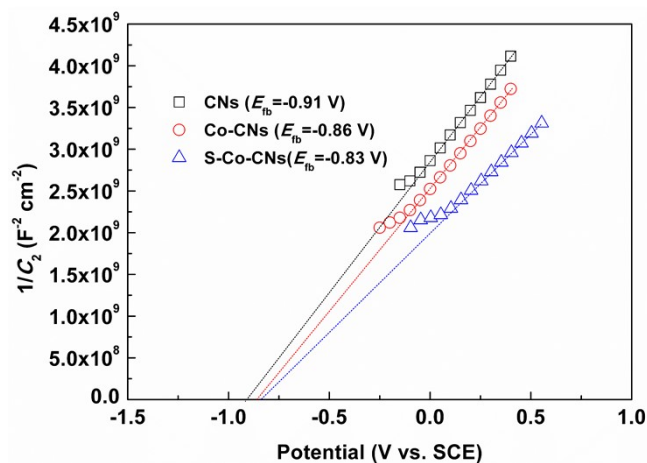

**Fig. S9** Mott-Schottky plots of pristine CNs, Co-CNs, and S-Co-CNs.

### References

1. S. Min and G. Lu, *J. Phys. Chem. C* 2012, **116**, 19644.
2. J. Xu, Y. Li, S. Peng, G. Lu and S. Li, *Phys. Chem. Chem. Phys.*, 2013, **15**, 7657.
3. Y. Wang, J. Hong, W. Zhang and R. Xu, *Catal. Sci. Technol.*, 2013, **3**, 1703.
4. X. Zhang, L. Yu, C. Zhuang, T. Peng, R. Li and X. Li, *ACS Catal.*, 2014, **4**, 162.
5. X. Zhang, T. Peng, L. Yu, R. Li, Q. Li and Zhen Li, *ACS Catal.*, 2015, **5**, 504.
6. J. Xu, Y. Li and S. Peng, *Int. J. Hydrogen Energy*, 2015, **40**, 353.
7. Z. Li, Y. Wu and G. Lu, *Appl. Catal., B*, 2016, **188**, 56.
8. Y. Xue, Y. Lei, X. Liu, Y. Li, W. Deng, F. Wang and S. Min, *New J. Chem.*, 2018, **42**, 14083.
9. P. Wang, Z. Guan and Q. Li, *J. Mater. Sci.*, 2018, **53**, 774.
10. P. Wang, L. Zong, Z. Guan, Q. Li and J. Yang, *Nanoscale Res. Lett.*, 2018, **13**, 33.
11. J. Xu, Y. Qi, W. Wang and L. Wang, *Int. J. Hydrogen Energy*, 2019, **44**, 4114.
12. M. Lu, Z. Sun, Y. Zhang, Q. Liang, M. Zhou, S. Xu and Z. Li, *Synth. Met.*, 2020, 268, 116480.
13. C. M. Nagaraja, M. Kaur and S. Dhingra, *Int. J. Hydrogen Energy*, 2020, **45**, 8497.
